# Supplementary material
Source: publisher figshare collection journal article supplement (https://acs.figshare.com/ndownloader/files/3804448)

**Supporting Information for publication**

**Synthesis of 5,6- and 7-membered 1,3- and 1,4-heterocyclic compounds *via* intramolecular hydroalkoxylation/hydrothioalkoxylation of alkenols/thioalkenols**

Manash J. Deka, Kiran Indukuri, Sabera Sultana, Madhurjya Borah and Anil K. Saikia\*

Department of Chemistry, Indian Institute of Technology Guwahati, Guwahati-781039, India

**Contents:**

|                                         |               |
|-----------------------------------------|---------------|
| <b>1. HRMS Spectra of all compounds</b> | <b>S2-S23</b> |
|-----------------------------------------|---------------|

## HRMS Spectra of **5a**

| Sample Name   | Position    | Instrument Name | User Name              |
|---------------|-------------|-----------------|------------------------|
| Inj Vol       | InjPosition | SampleType      | IRM Calibration Status |
| Data Filename | ACQ Method  | Comment         | Acquired Time          |

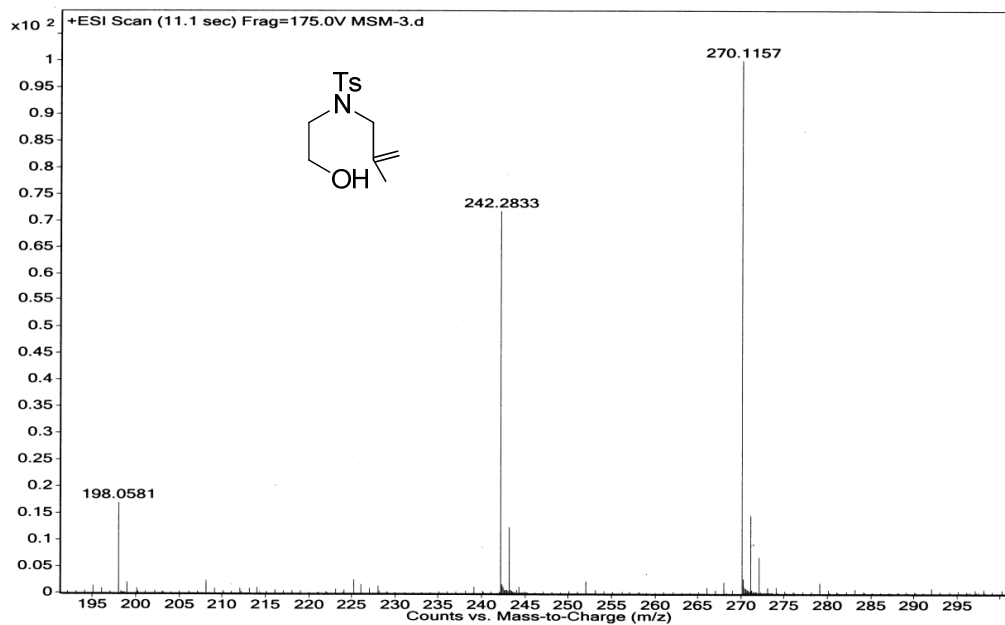

## HRMS Spectra of **5b**

| Sample Name   | Position    | Instrument Name | User Name              |
|---------------|-------------|-----------------|------------------------|
| Inj Vol       | InjPosition | SampleType      | IRM Calibration Status |
| Data Filename | ACQ Method  | Comment         | Acquired Time          |

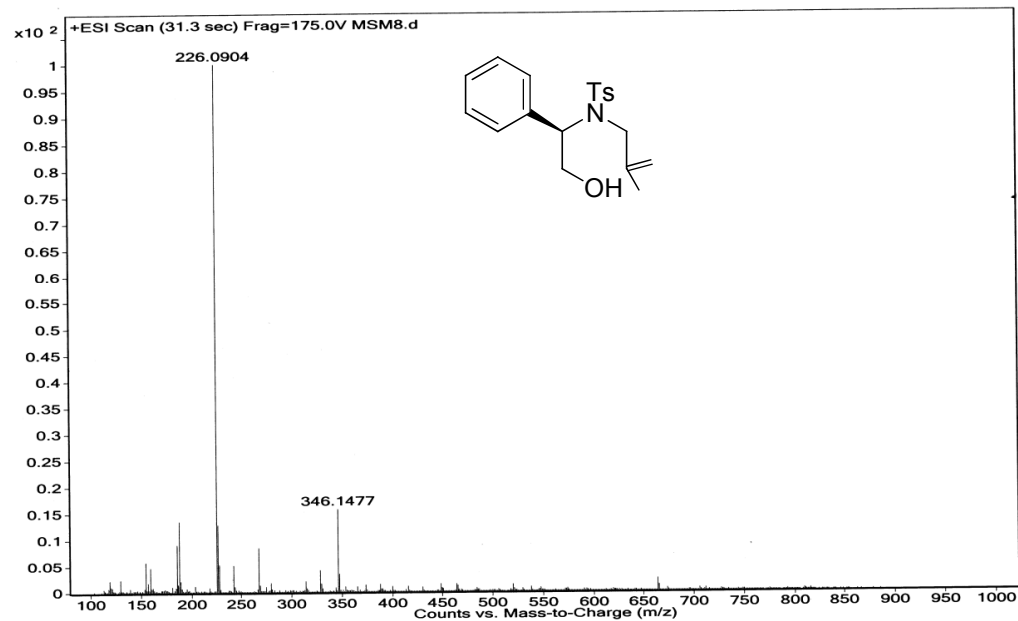

## HRMS Spectra of **5c**

| Sample Name   | Position    | Instrument Name | User Name              |
|---------------|-------------|-----------------|------------------------|
| Inj Vol       | InjPosition | SampleType      | IRM Calibration Status |
| Data Filename | ACQ Method  | Comment         | Acquired Time          |

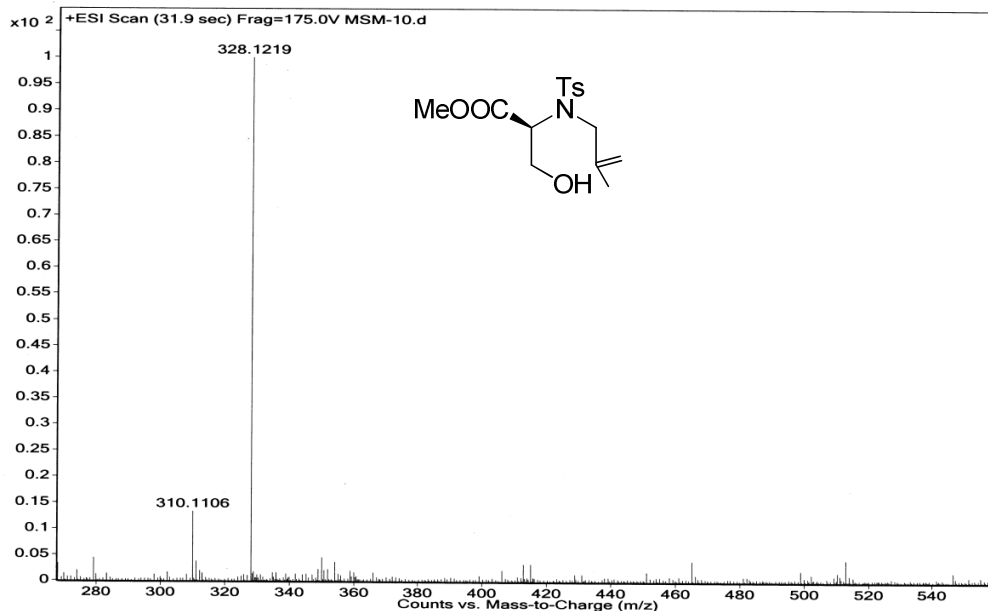

## HRMS Spectra of **5d**

| Sample Name   | Position    | Instrument Name | User Name              |
|---------------|-------------|-----------------|------------------------|
| Inj Vol       | InjPosition | SampleType      | IRM Calibration Status |
| Data Filename | ACQ Method  | Comment         | Acquired Time          |

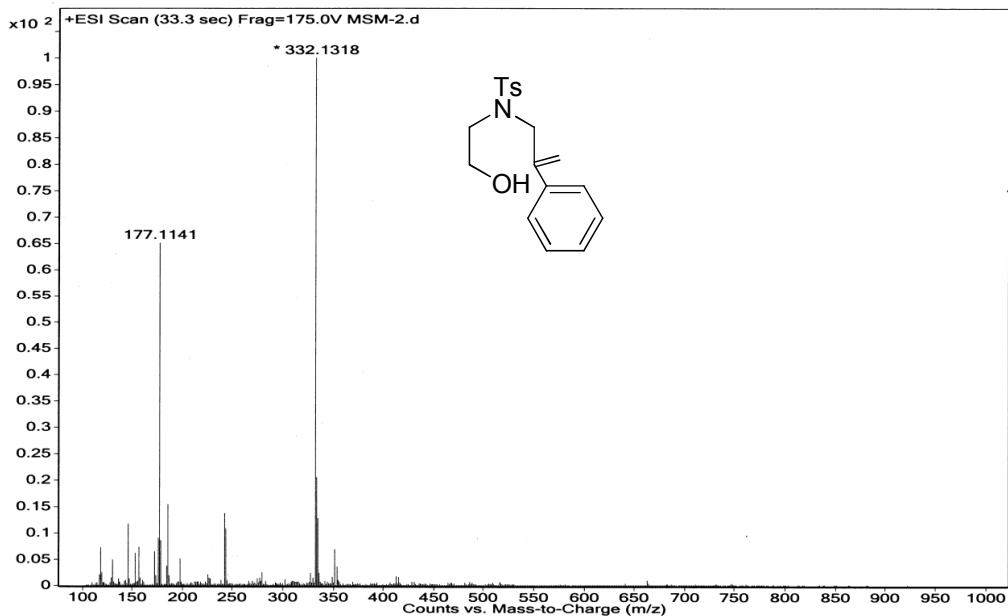

## HRMS Spectra of **5e**

| Sample Name   | Position    | Instrument Name | User Name              |
|---------------|-------------|-----------------|------------------------|
| Inj Vol       | InjPosition | SampleType      | IRM Calibration Status |
| Data Filename | ACQ Method  | Comment         | Acquired Time          |

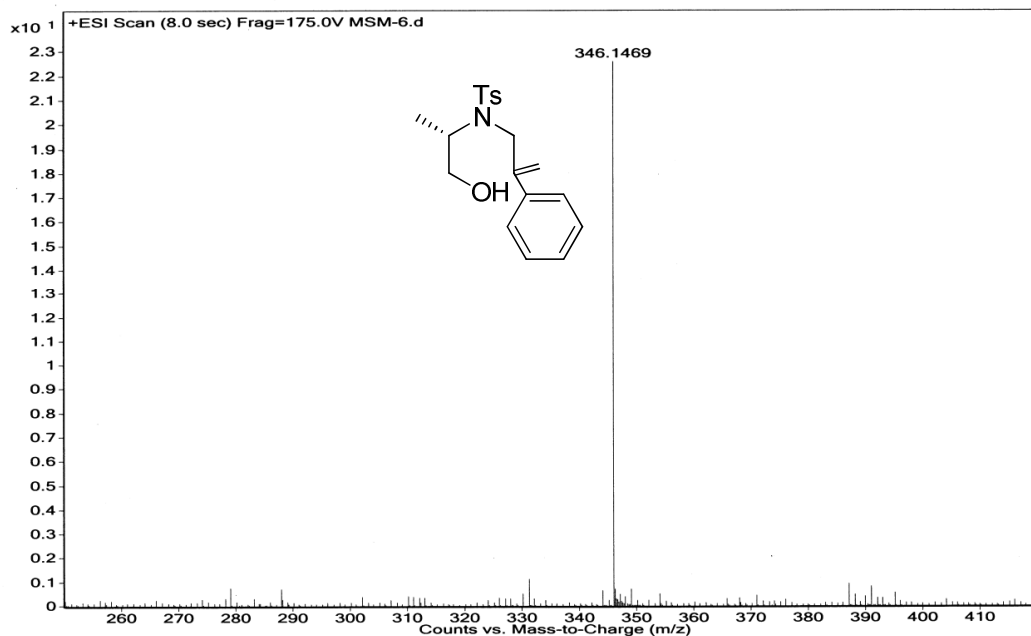

## HRMS Spectra of **5f**

| Sample Name   | Position    | Instrument Name | User Name              |
|---------------|-------------|-----------------|------------------------|
| Inj Vol       | InjPosition | SampleType      | IRM Calibration Status |
| Data Filename | ACQ Method  | Comment         | Acquired Time          |

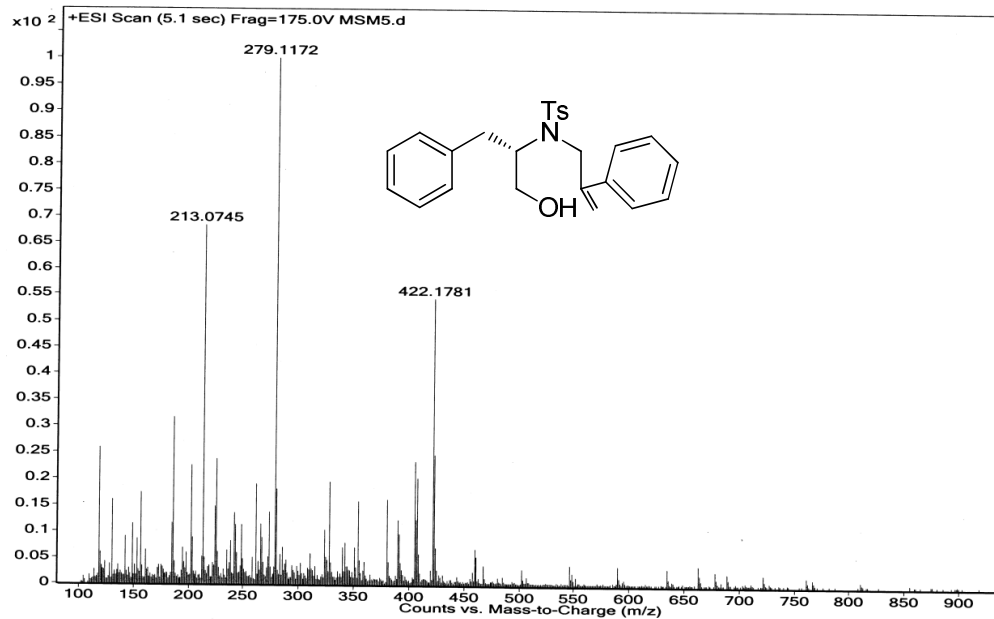

## HRMS Spectra of **5g**

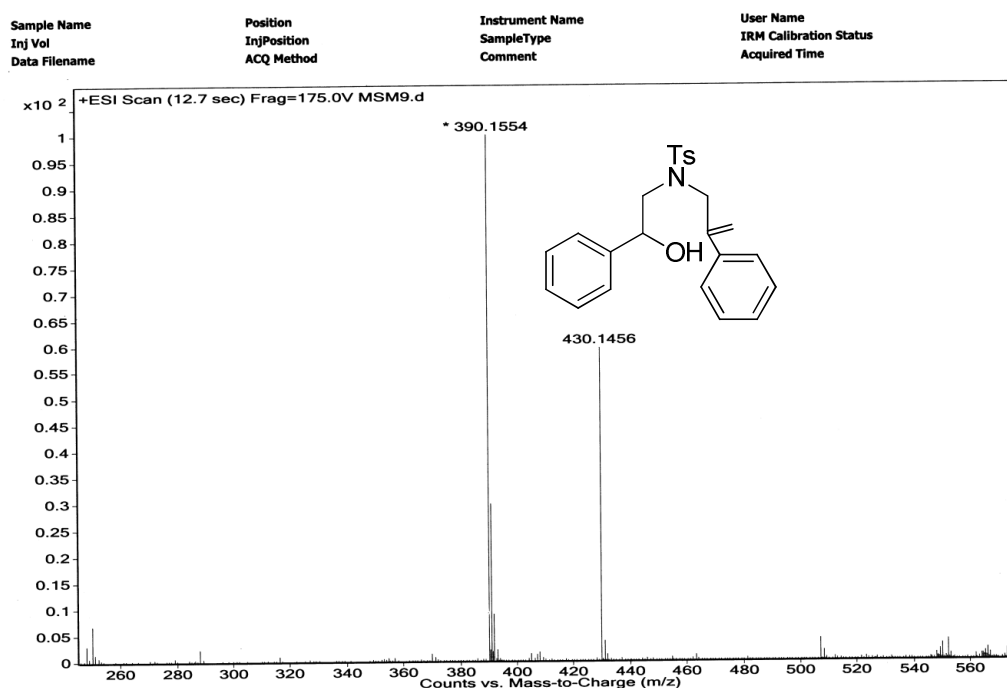

## HRMS Spectra of **5h**

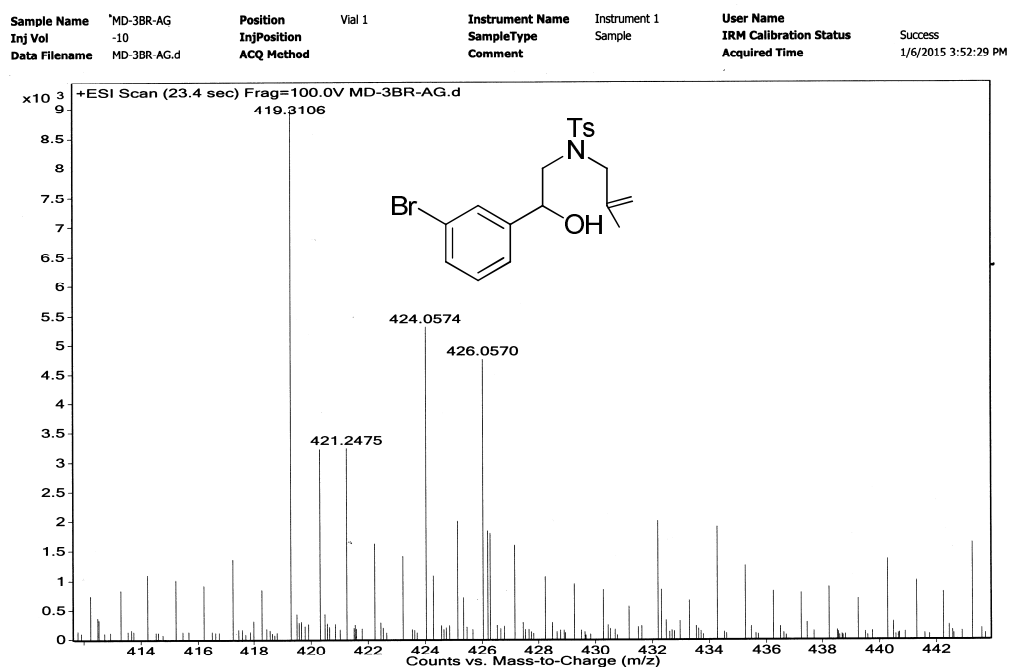

## HRMS Spectra of **5i**

|                      |               |                    |        |                        |              |                               |                     |
|----------------------|---------------|--------------------|--------|------------------------|--------------|-------------------------------|---------------------|
| <b>Sample Name</b>   | MD-3BR-PH-A   | <b>Position</b>    | Vial 1 | <b>Instrument Name</b> | Instrument 1 | <b>User Name</b>              |                     |
| <b>Inj Vol</b>       | -10           | <b>InjPosition</b> |        | <b>SampleType</b>      | Sample       | <b>IRM Calibration Status</b> | Success             |
| <b>Data Filename</b> | MD-3BR-PH-A.d | <b>ACQ Method</b>  |        | <b>Comment</b>         |              | <b>Acquired Time</b>          | 1/7/2015 2:53:12 PM |

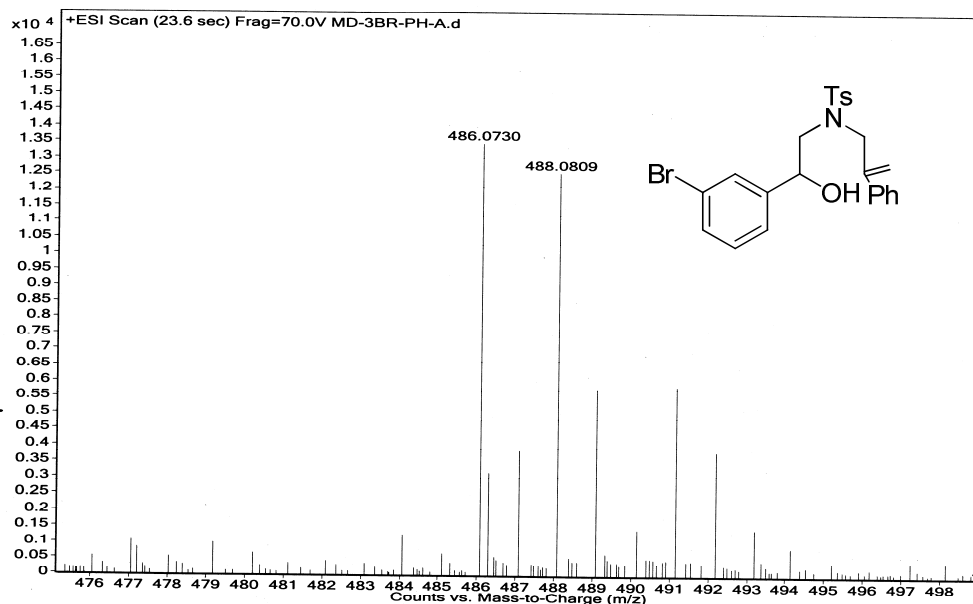

## HRMS Spectra of **5j**

|                      |               |                    |        |                        |              |                               |                     |
|----------------------|---------------|--------------------|--------|------------------------|--------------|-------------------------------|---------------------|
| <b>Sample Name</b>   | MD-SO-NO-AB   | <b>Position</b>    | Vial 1 | <b>Instrument Name</b> | Instrument 1 | <b>User Name</b>              |                     |
| <b>Inj Vol</b>       | -10           | <b>InjPosition</b> |        | <b>SampleType</b>      | Sample       | <b>IRM Calibration Status</b> | Success             |
| <b>Data Filename</b> | MD-SO-NO-AB.d | <b>ACQ Method</b>  |        | <b>Comment</b>         |              | <b>Acquired Time</b>          | 1/7/2015 2:51:13 PM |

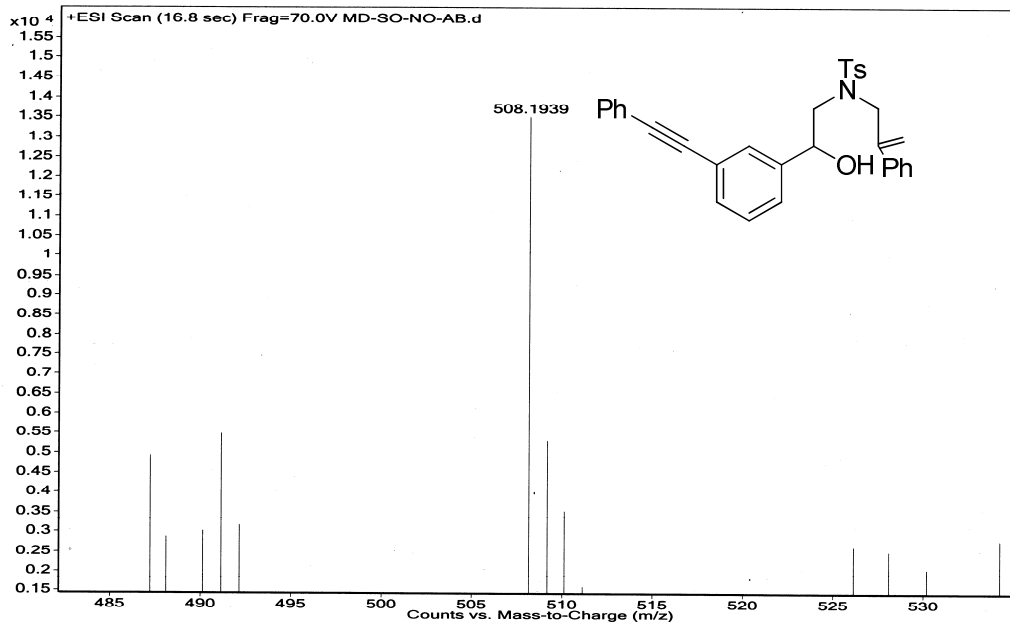

## HRMS Spectra of 5k

|               |             |             |        |                 |              |                        |                     |
|---------------|-------------|-------------|--------|-----------------|--------------|------------------------|---------------------|
| Sample Name   | MD-CF3-AG   | Position    | Vial 1 | Instrument Name | Instrument 1 | User Name              |                     |
| Inj Vol       | -10         | InjPosition |        | SampleType      | Sample       | IRM Calibration Status | Success             |
| Data Filename | MD-CF3-AG.d | ACQ Method  |        | Comment         |              | Acquired Time          | 1/6/2015 3:56:58 PM |

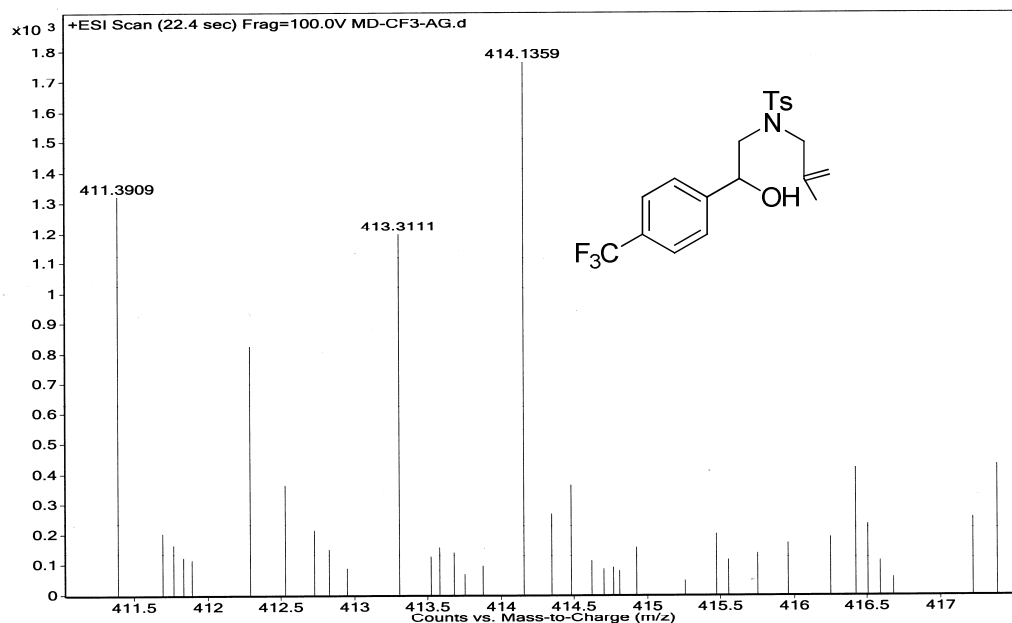

## HRMS Spectra of 5m

|               |  |             |  |                 |  |                        |  |
|---------------|--|-------------|--|-----------------|--|------------------------|--|
| Sample Name   |  | Position    |  | Instrument Name |  | User Name              |  |
| Inj Vol       |  | InjPosition |  | SampleType      |  | IRM Calibration Status |  |
| Data Filename |  | ACQ Method  |  | Comment         |  | Acquired Time          |  |

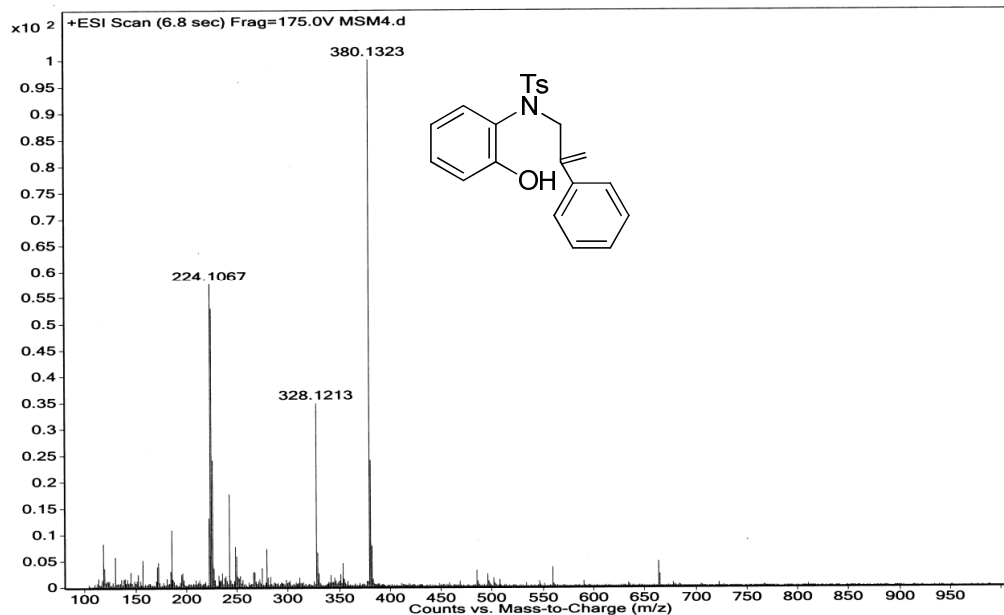

## HRMS Spectra of **5n**

|                      |                    |                        |                               |
|----------------------|--------------------|------------------------|-------------------------------|
| <b>Sample Name</b>   | <b>Position</b>    | <b>Instrument Name</b> | <b>User Name</b>              |
| <b>Inj Vol</b>       | <b>InjPosition</b> | <b>SampleType</b>      | <b>IRM Calibration Status</b> |
| <b>Data Filename</b> | <b>ACQ Method</b>  | <b>Comment</b>         | <b>Acquired Time</b>          |

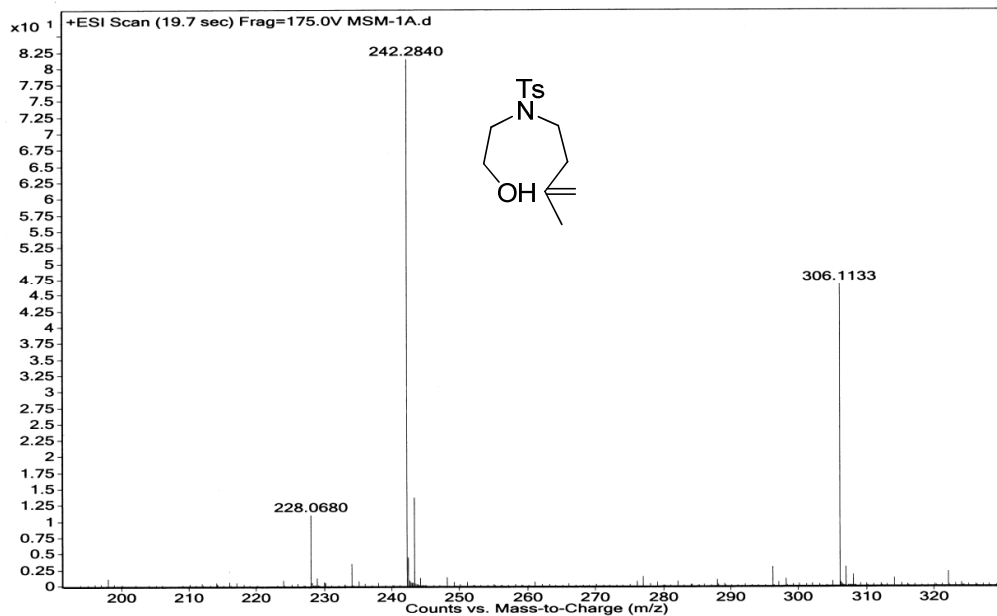

## HRMS Spectra of **5o**

|                      |                    |                        |                               |
|----------------------|--------------------|------------------------|-------------------------------|
| <b>Sample Name</b>   | <b>Position</b>    | <b>Instrument Name</b> | <b>User Name</b>              |
| <b>Inj Vol</b>       | <b>InjPosition</b> | <b>SampleType</b>      | <b>IRM Calibration Status</b> |
| <b>Data Filename</b> | <b>ACQ Method</b>  | <b>Comment</b>         | <b>Acquired Time</b>          |

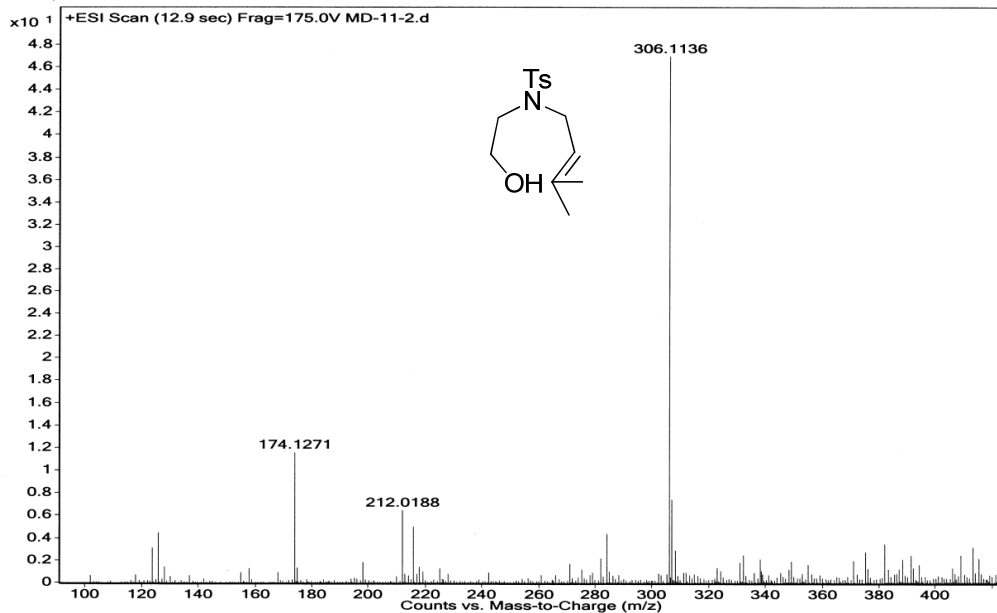



## HRMS Spectra of 5p

|               |             |                 |                        |
|---------------|-------------|-----------------|------------------------|
| Sample Name   | Position    | Instrument Name | User Name              |
| Inj Vol       | InjPosition | SampleType      | IRM Calibration Status |
| Data Filename | ACQ Method  | Comment         | Acquired Time          |

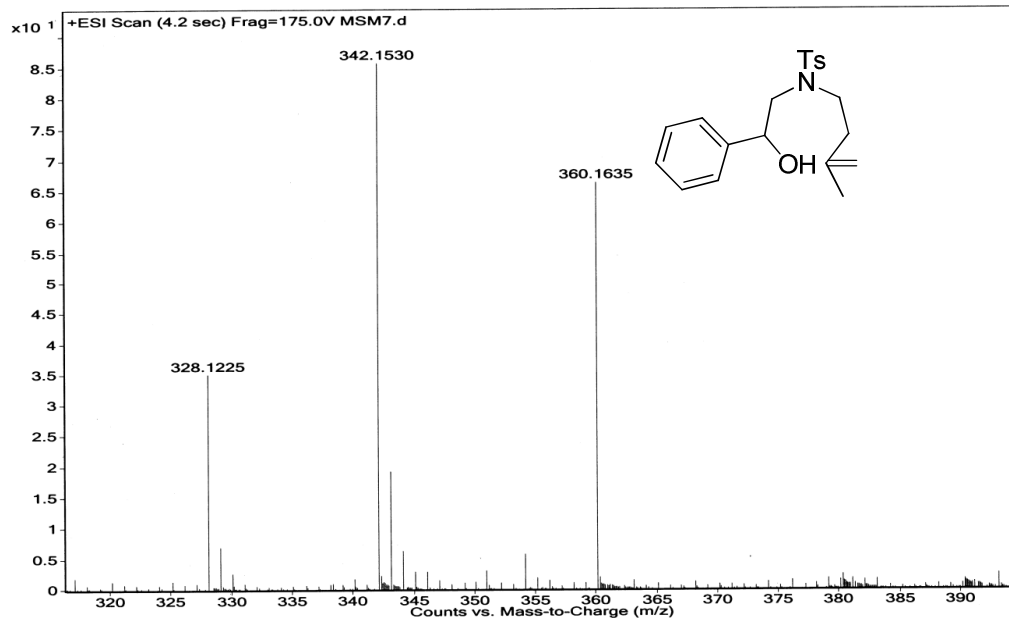

## HRMS Spectra of 5q

|               |             |                 |                        |
|---------------|-------------|-----------------|------------------------|
| Sample Name   | Position    | Instrument Name | User Name              |
| Inj Vol       | InjPosition | SampleType      | IRM Calibration Status |
| Data Filename | ACQ Method  | Comment         | Acquired Time          |

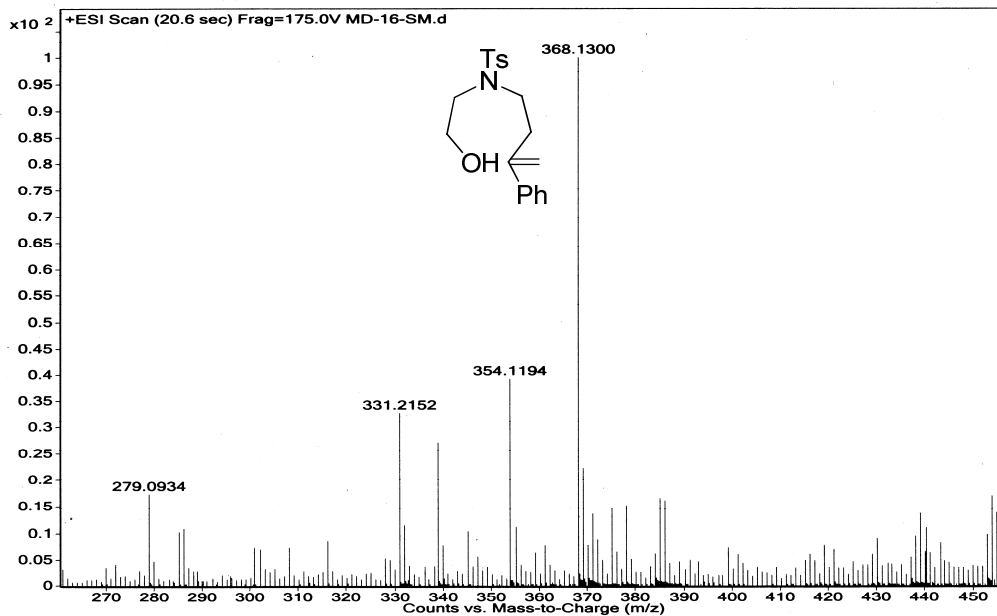

## HRMS Spectra of **5s**

| Sample Name   | Position    | Instrument Name | User Name              |
|---------------|-------------|-----------------|------------------------|
| Inj Vol       | InjPosition | SampleType      | IRM Calibration Status |
| Data Filename | ACQ Method  | Comment         | Acquired Time          |

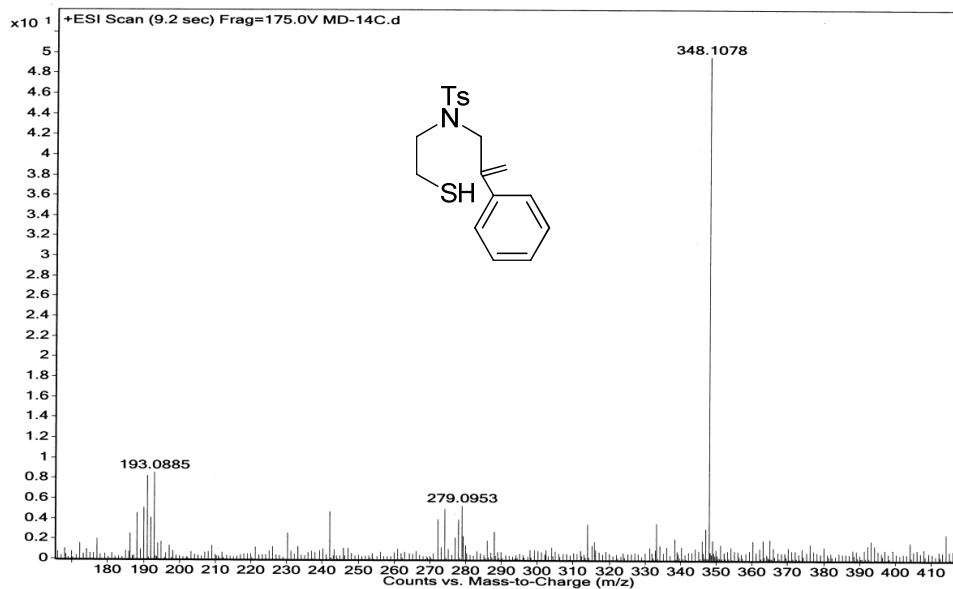

## HRMS Spectra of **5t**

| Sample Name   | Position    | Instrument Name | User Name              |
|---------------|-------------|-----------------|------------------------|
| Inj Vol       | InjPosition | SampleType      | IRM Calibration Status |
| Data Filename | ACQ Method  | Comment         | Acquired Time          |

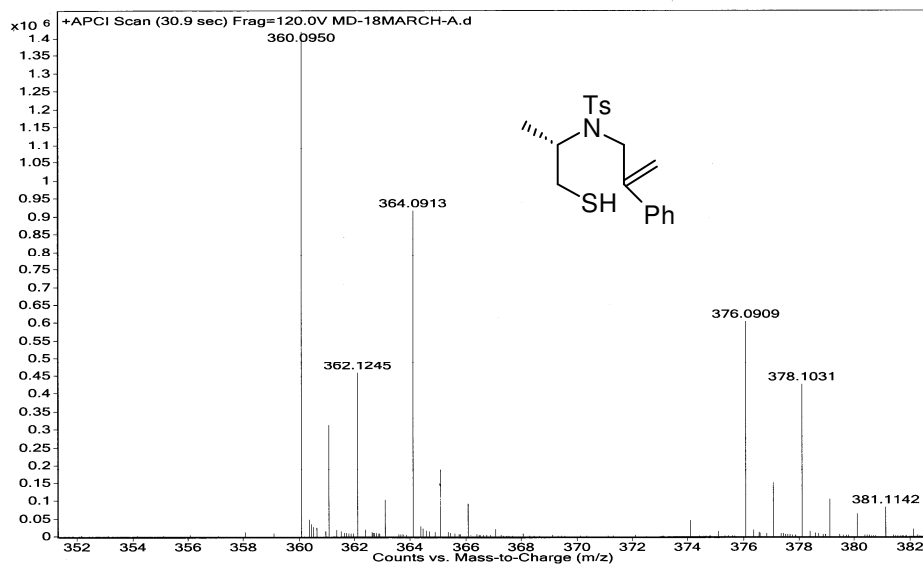

## HRMS Spectra of 5u

| Sample Name   | Position    | Instrument Name | User Name              |
|---------------|-------------|-----------------|------------------------|
| Inj Vol       | InjPosition | SampleType      | IRM Calibration Status |
| Data Filename | ACQ Method  | Comment         | Acquired Time          |

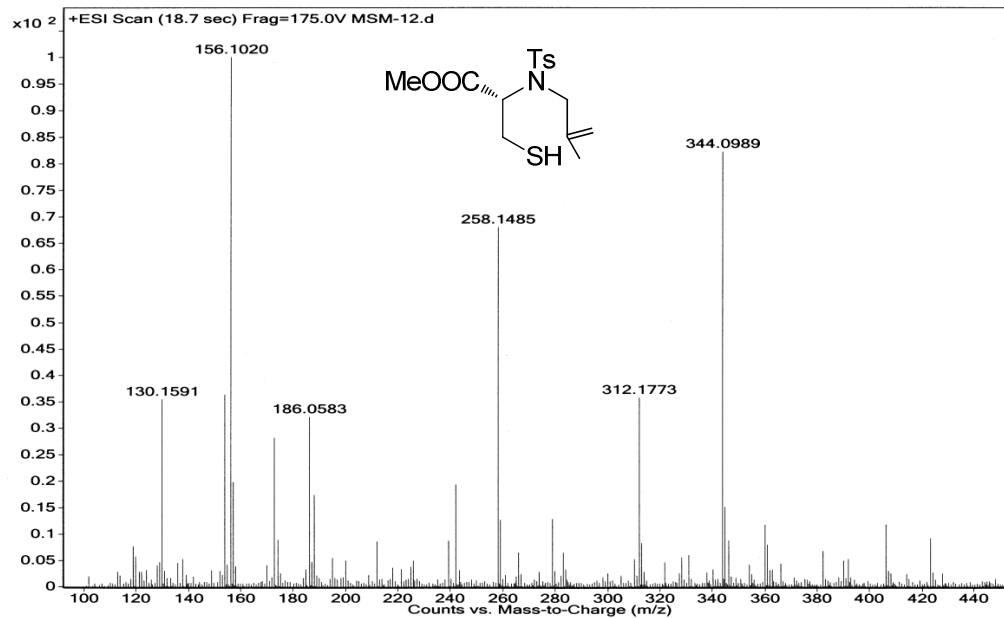

## HRMS Spectra of 5v

| Sample Name   | Position    | Instrument Name | User Name              |
|---------------|-------------|-----------------|------------------------|
| Inj Vol       | InjPosition | SampleType      | IRM Calibration Status |
| Data Filename | ACQ Method  | Comment         | Acquired Time          |

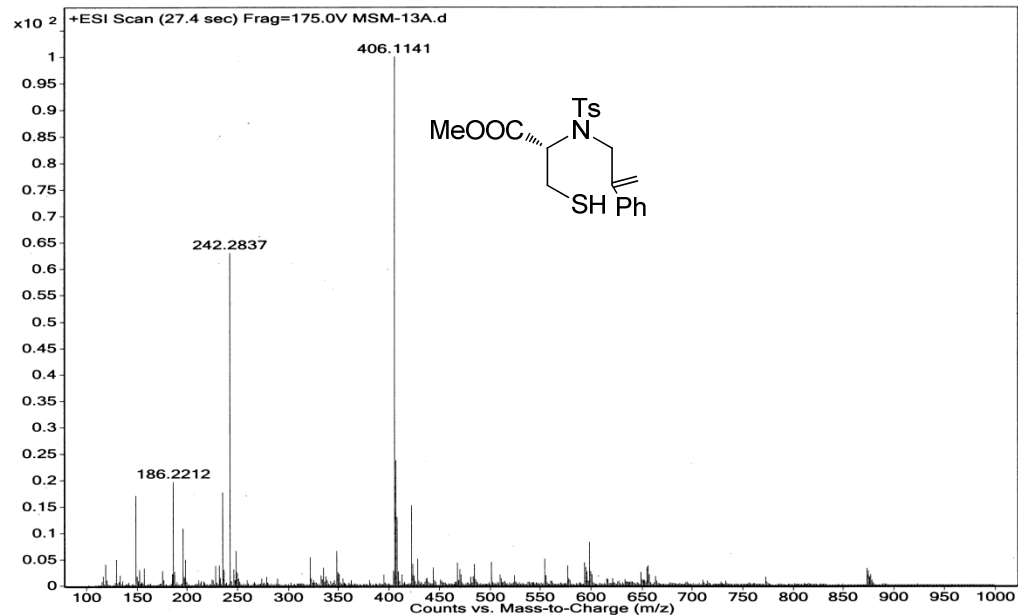

## HRMS Spectra of 5w

|               |                |             |    |                 |              |                        |                        |
|---------------|----------------|-------------|----|-----------------|--------------|------------------------|------------------------|
| Sample Name   | MD-16-OCT-SM   | Position    | -1 | Instrument Name | Instrument 1 | User Name              |                        |
| Inj Vol       | -10            | InjPosition |    | SampleType      | Sample       | IRM Calibration Status | Success                |
| Data Filename | MD-16-OCT-SM.d | ACQ Method  |    | Comment         |              | Acquired Time          | 10/16/2014 10:42:05 AM |

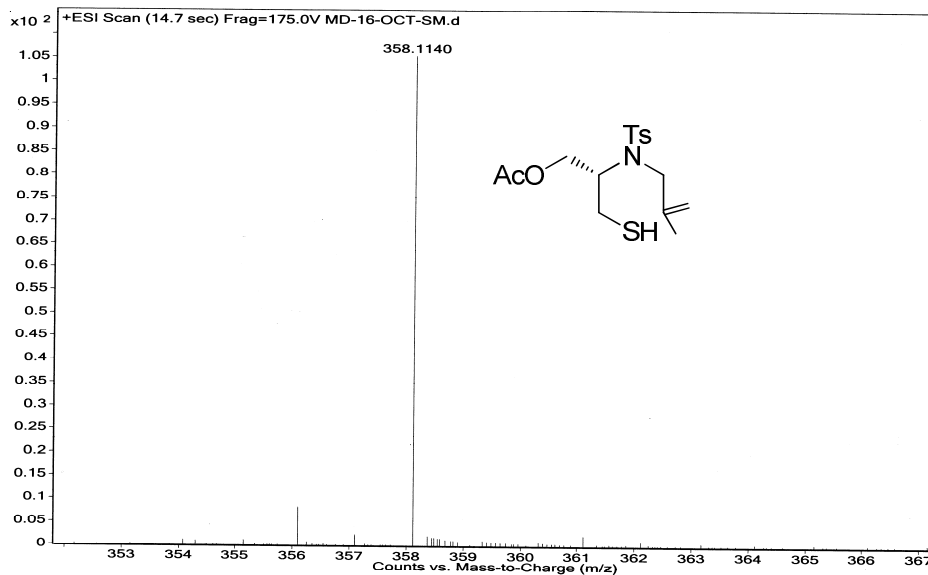

## HRMS Spectra of 5x

|               |              |             |             |                 |                                   |                        |             |
|---------------|--------------|-------------|-------------|-----------------|-----------------------------------|------------------------|-------------|
| Sample Name   | Unavailable  | Position    | Unavailable | Instrument Name | Unavailable                       | User Name              | Unavailable |
| Inj Vol       | Unavailable  | InjPosition | Unavailable | SampleType      | Unavailable                       | IRM Calibration Status | Success     |
| Data Filename | MD-SH-OH-6.d | ACQ Method  |             | Comment         | Sample information is unavailable | Acquired Time          | Unavailable |

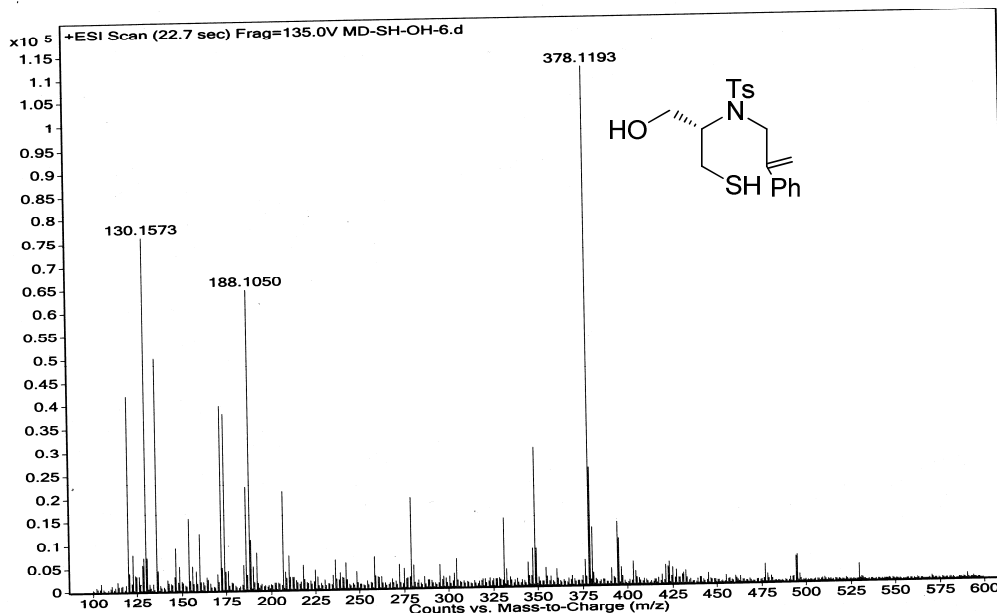

## HRMS Spectra of **6a**

|                      |         |                    |    |                        |              |                               |                       |
|----------------------|---------|--------------------|----|------------------------|--------------|-------------------------------|-----------------------|
| <b>Sample Name</b>   | MD3F6   | <b>Position</b>    | -1 | <b>Instrument Name</b> | Instrument 1 | <b>User Name</b>              |                       |
| <b>Inj Vol</b>       | -10     | <b>InjPosition</b> |    | <b>SampleType</b>      | Sample       | <b>IRM Calibration Status</b> | Success               |
| <b>Data Filename</b> | MD3F6.d | <b>ACQ Method</b>  |    | <b>Comment</b>         |              | <b>Acquired Time</b>          | 4/28/2014 11:55:32 AM |

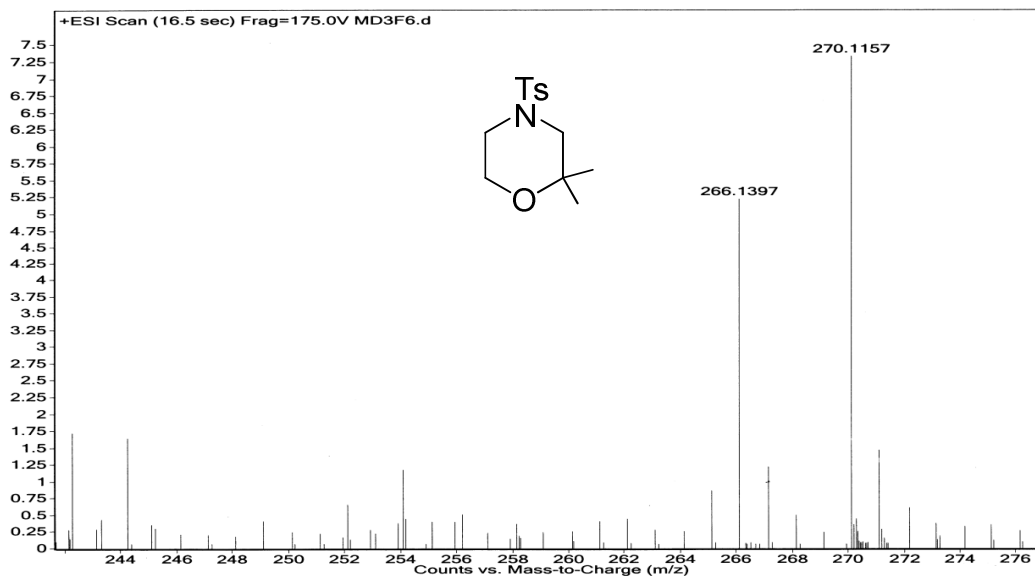

## HRMS Spectra of **6b**

|                      |  |                    |  |                        |  |                               |  |
|----------------------|--|--------------------|--|------------------------|--|-------------------------------|--|
| <b>Sample Name</b>   |  | <b>Position</b>    |  | <b>Instrument Name</b> |  | <b>User Name</b>              |  |
| <b>Inj Vol</b>       |  | <b>InjPosition</b> |  | <b>SampleType</b>      |  | <b>IRM Calibration Status</b> |  |
| <b>Data Filename</b> |  | <b>ACQ Method</b>  |  | <b>Comment</b>         |  | <b>Acquired Time</b>          |  |

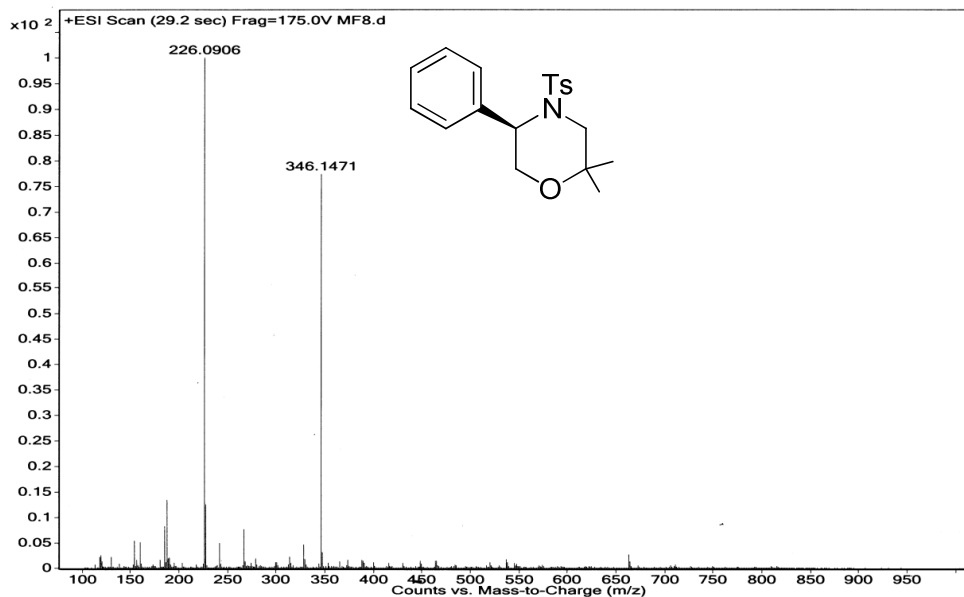

## HRMS Spectra of **6c**

| Sample Name   | Position    | Instrument Name | User Name              |
|---------------|-------------|-----------------|------------------------|
| Inj Vol       | InjPosition | SampleType      | IRM Calibration Status |
| Data Filename | ACQ Method  | Comment         | Acquired Time          |

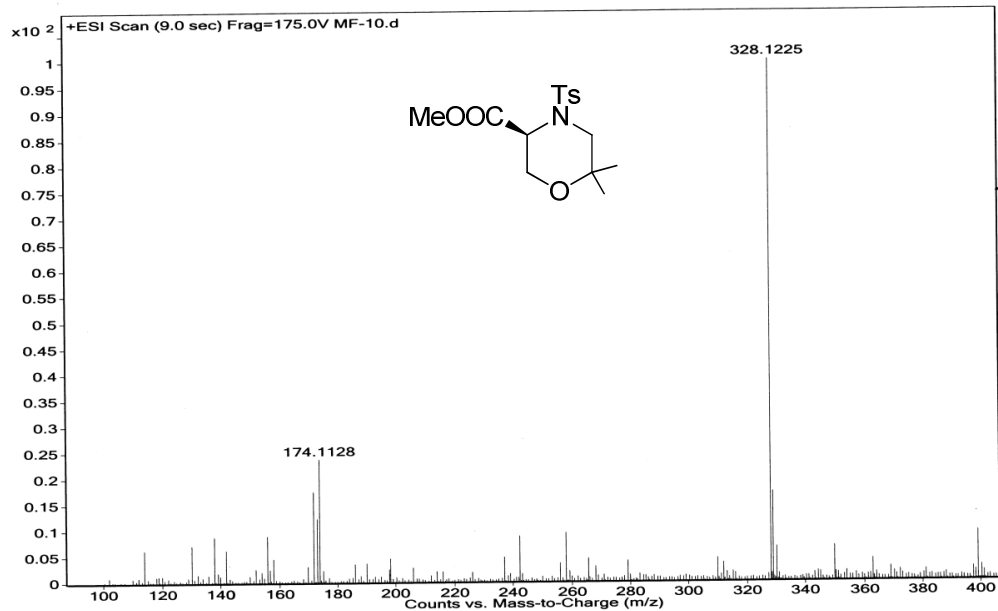

## HRMS Spectra of **6d**

| Sample Name   | Position    | Instrument Name | User Name              |
|---------------|-------------|-----------------|------------------------|
| Inj Vol       | InjPosition | SampleType      | IRM Calibration Status |
| Data Filename | ACQ Method  | Comment         | Acquired Time          |

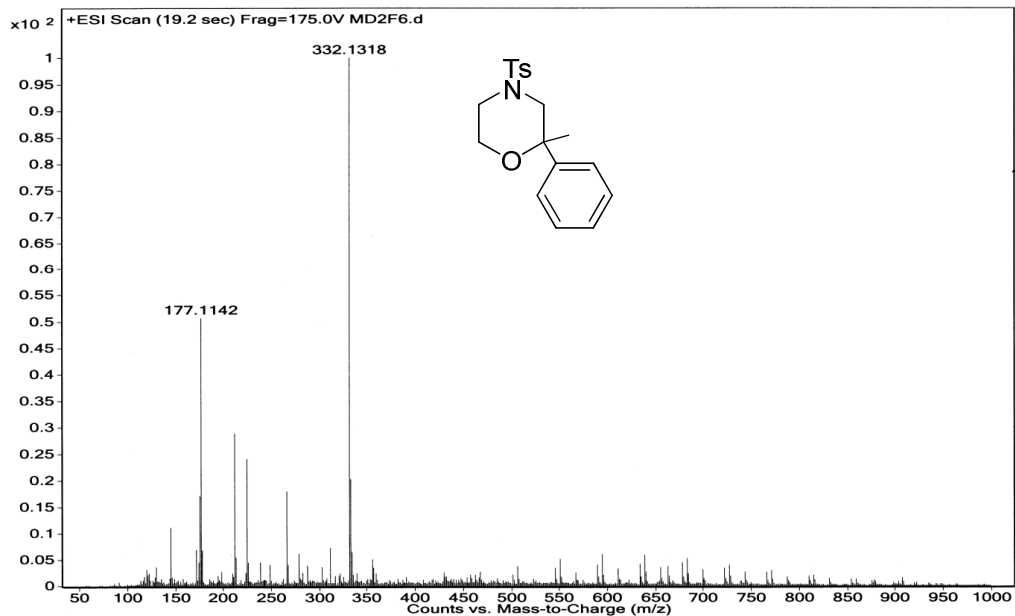

## HRMS Spectra of **6e**

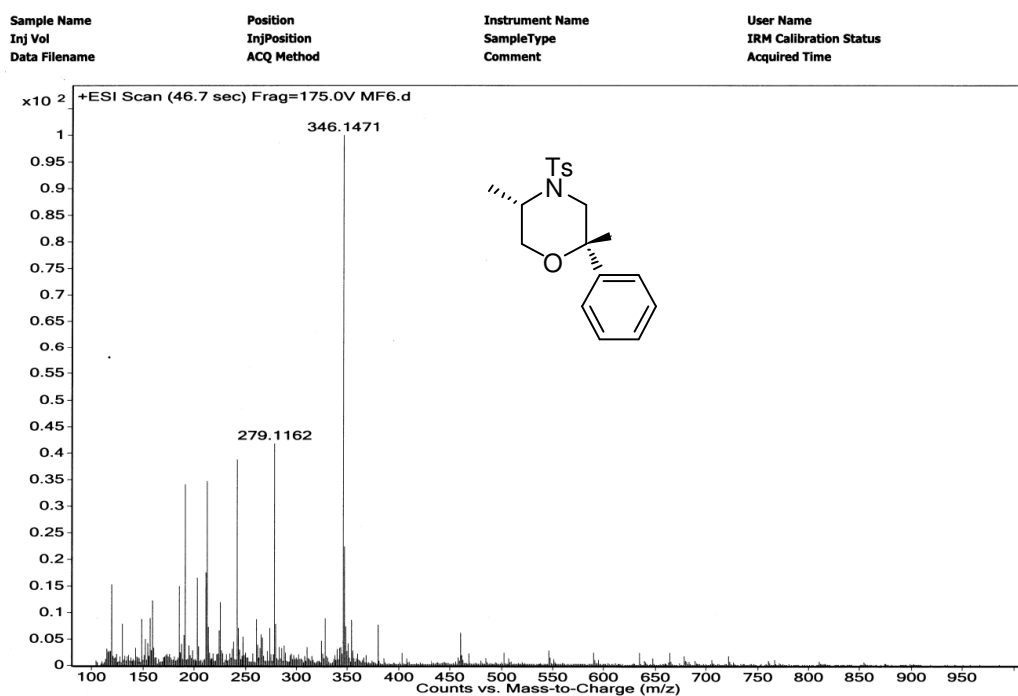

## HRMS Spectra of **6f**

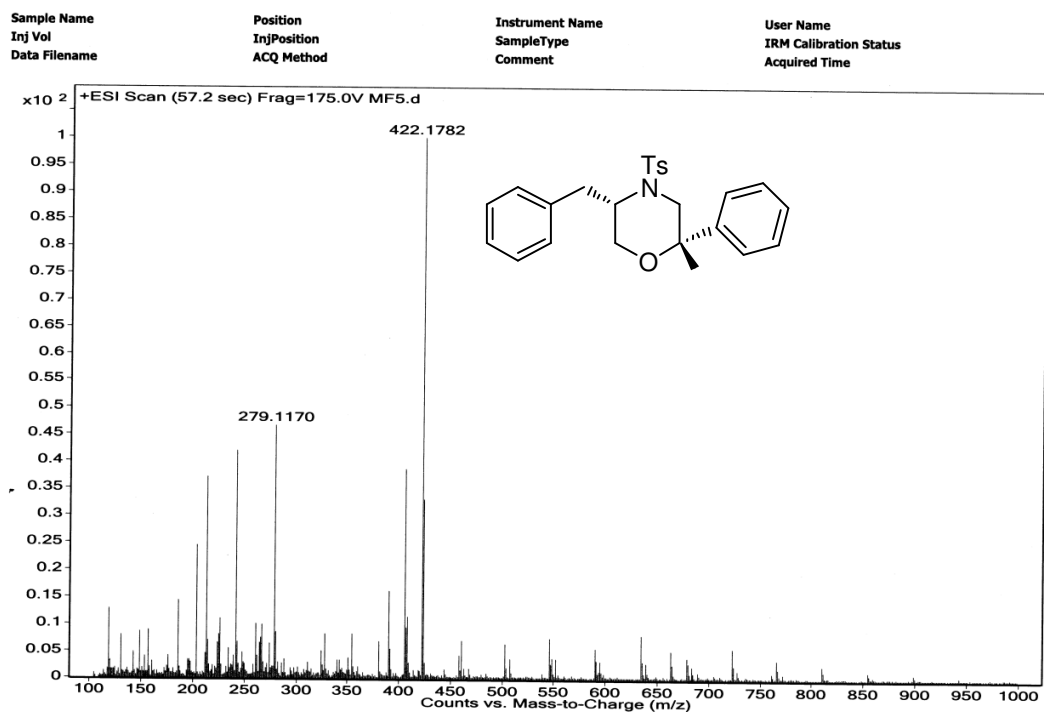

## HRMS Spectra of **6g**

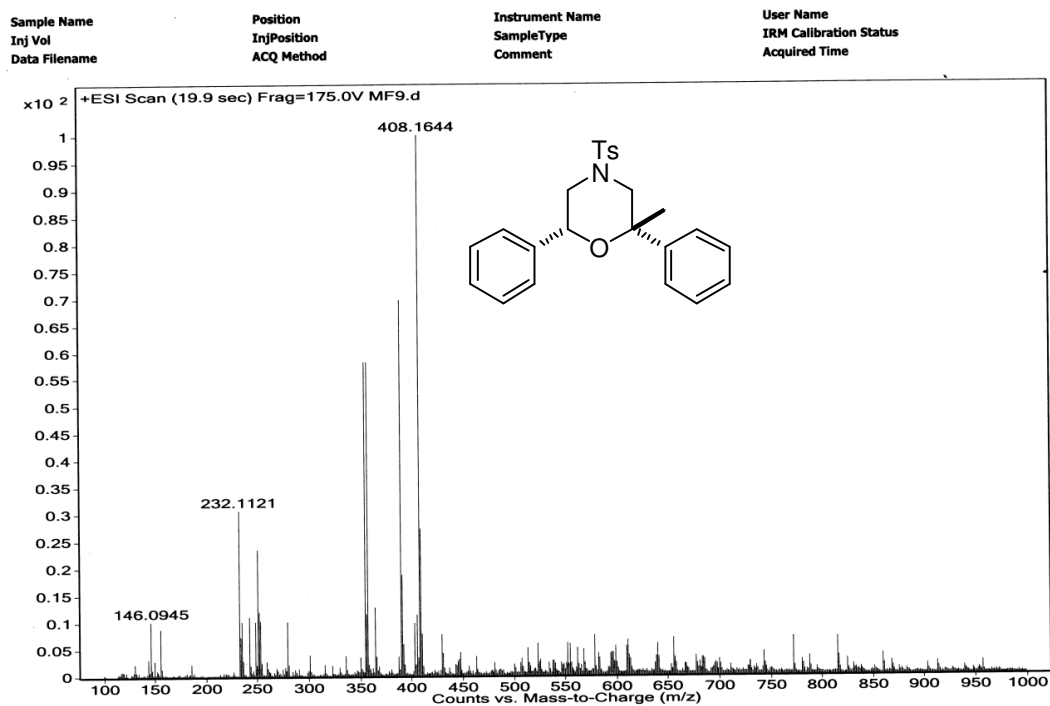

## HRMS Spectra of **6h**

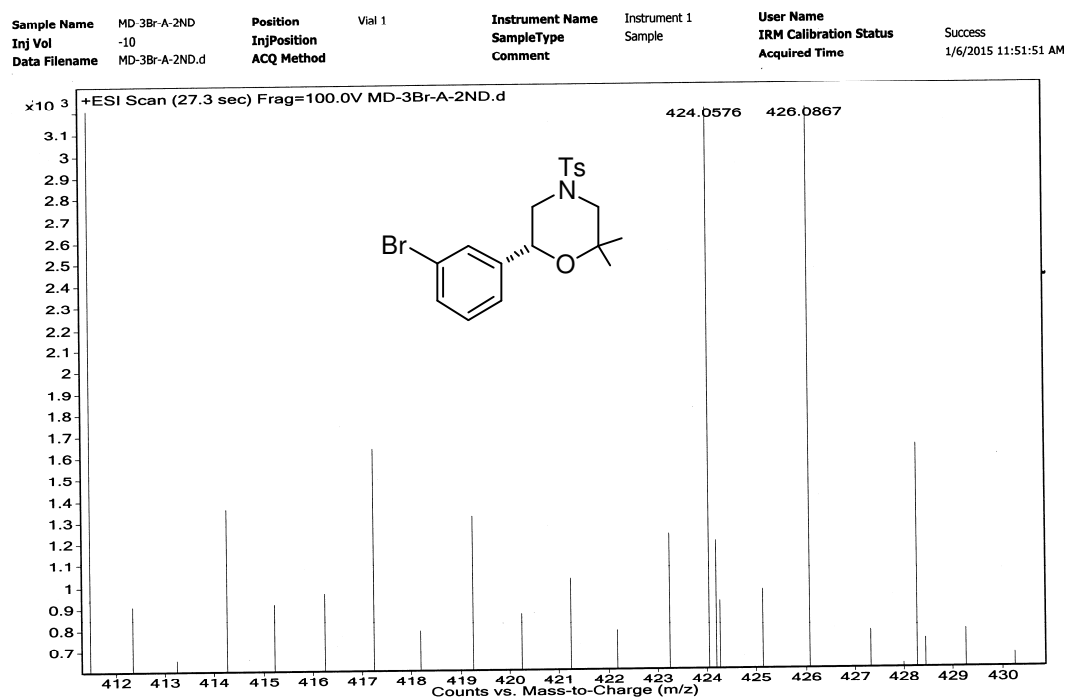



## HRMS Spectra of **6i**

|                      |               |                    |        |                        |              |                               |                     |
|----------------------|---------------|--------------------|--------|------------------------|--------------|-------------------------------|---------------------|
| <b>Sample Name</b>   | MD-3BR-PH-B   | <b>Position</b>    | Vial 1 | <b>Instrument Name</b> | Instrument 1 | <b>User Name</b>              |                     |
| <b>Inj Vol</b>       | -10           | <b>InjPosition</b> |        | <b>SampleType</b>      | Sample       | <b>IRM Calibration Status</b> | Success             |
| <b>Data Filename</b> | MD-3BR-PH-B.d | <b>ACQ Method</b>  |        | <b>Comment</b>         |              | <b>Acquired Time</b>          | 1/7/2015 2:54:44 PM |

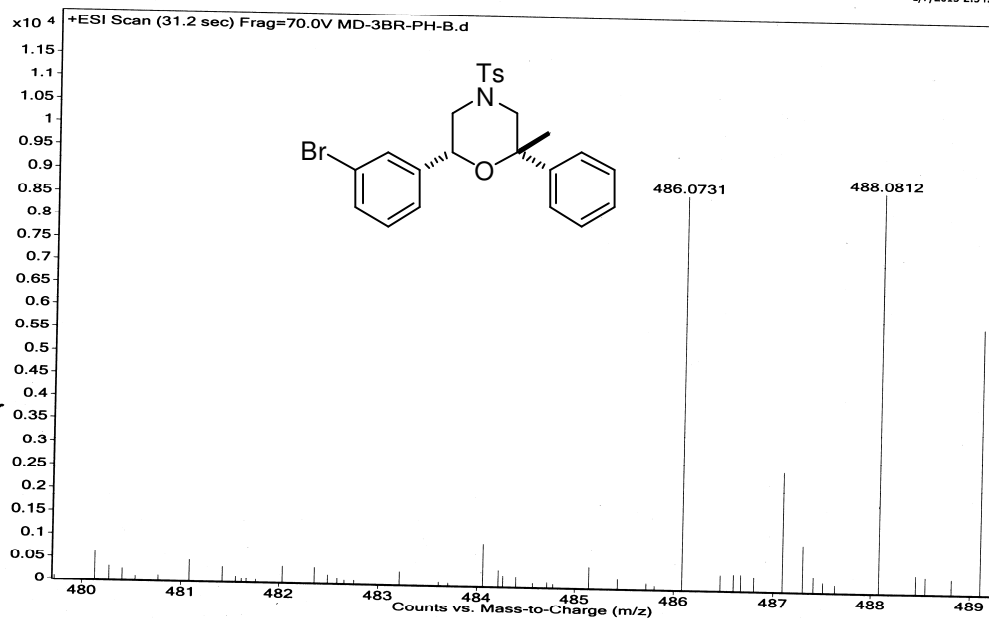

## HRMS Spectra of **6j**

|                      |             |                    |        |                        |              |                               |                      |
|----------------------|-------------|--------------------|--------|------------------------|--------------|-------------------------------|----------------------|
| <b>Sample Name</b>   | MD-SONO-F   | <b>Position</b>    | Vial 1 | <b>Instrument Name</b> | Instrument 1 | <b>User Name</b>              |                      |
| <b>Inj Vol</b>       | -10         | <b>InjPosition</b> |        | <b>SampleType</b>      | Sample       | <b>IRM Calibration Status</b> | Success              |
| <b>Data Filename</b> | MD-SONO-F.d | <b>ACQ Method</b>  |        | <b>Comment</b>         |              | <b>Acquired Time</b>          | 1/6/2015 11:55:03 AM |

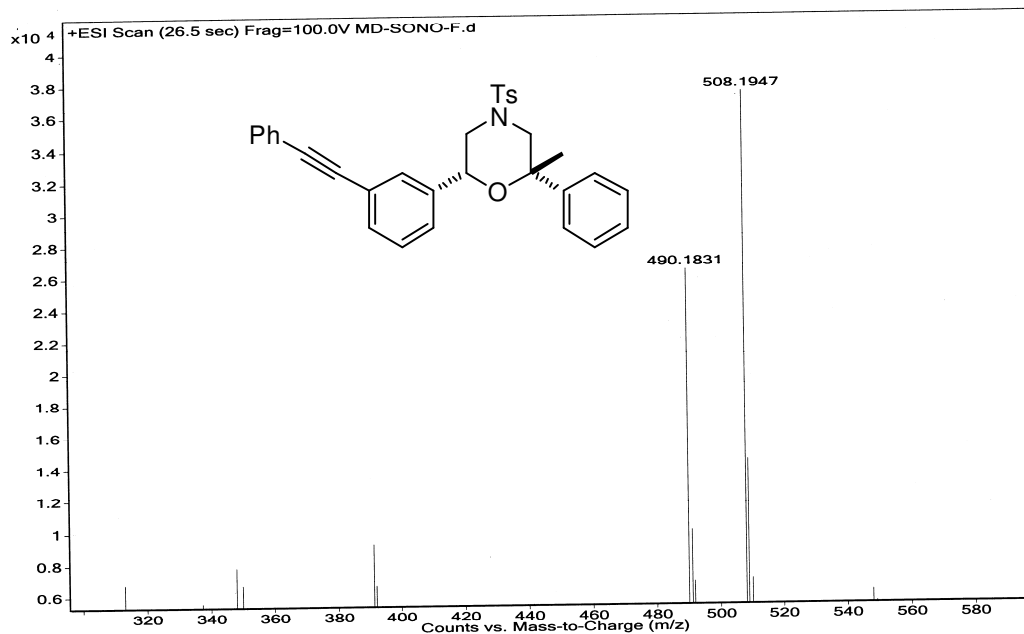

## HRMS Spectra of 6k

|               |            |             |        |                 |              |                        |                     |
|---------------|------------|-------------|--------|-----------------|--------------|------------------------|---------------------|
| Sample Name   | MD-CF3-A   | Position    | Vial 1 | Instrument Name | Instrument 1 | User Name              |                     |
| Inj Vol       | -10        | InjPosition |        | SampleType      | Sample       | IRM Calibration Status | Success             |
| Data Filename | MD-CF3-A.d | ACQ Method  |        | Comment         |              | Acquired Time          | 1/7/2015 2:56:37 PM |

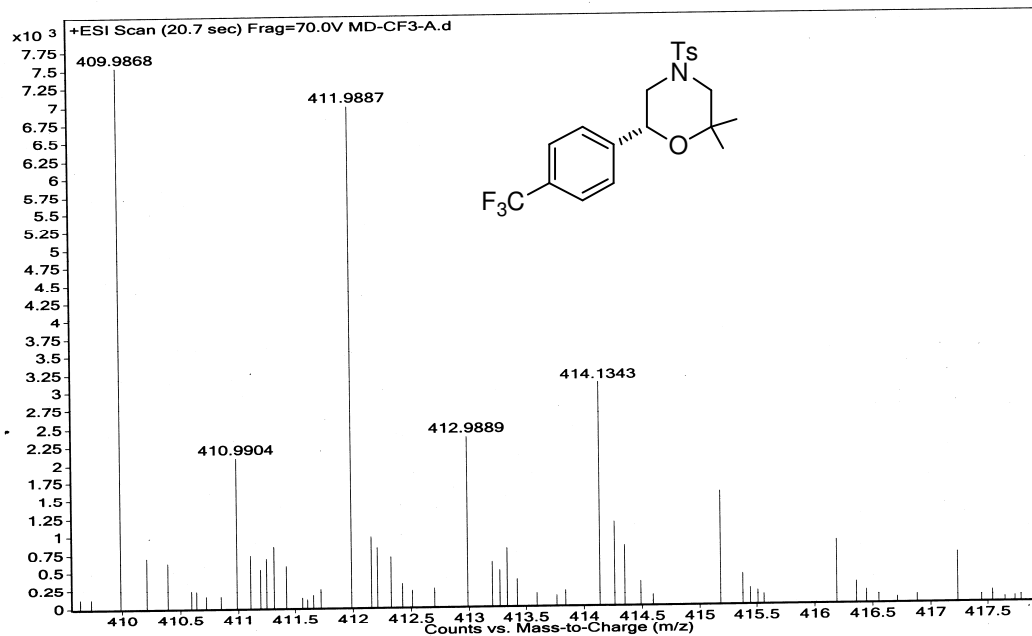

## HRMS Spectra of 6m

|               |         |             |    |                 |              |                        |                       |
|---------------|---------|-------------|----|-----------------|--------------|------------------------|-----------------------|
| Sample Name   | MD4F6   | Position    | -1 | Instrument Name | Instrument 1 | User Name              |                       |
| Inj Vol       | -10     | InjPosition |    | SampleType      | Sample       | IRM Calibration Status | Success               |
| Data Filename | MD4F6.d | ACQ Method  |    | Comment         |              | Acquired Time          | 4/28/2014 11:58:27 AM |

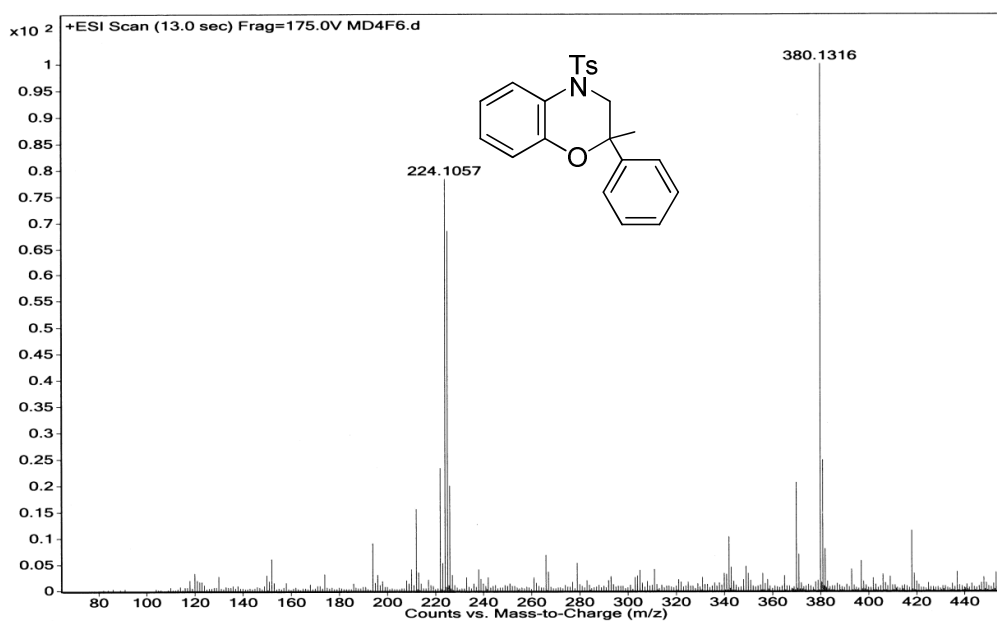

## HRMS Spectra of 6n

|               |          |             |    |                 |              |                        |                      |
|---------------|----------|-------------|----|-----------------|--------------|------------------------|----------------------|
| Sample Name   | MD-BF3   | Position    | -1 | Instrument Name | Instrument 1 | User Name              |                      |
| Inj Vol       | -10      | InjPosition |    | SampleType      | Sample       | IRM Calibration Status | Success              |
| Data Filename | MD-BF3.d | ACQ Method  |    | Comment         |              | Acquired Time          | 7/17/2013 2:33:52 PM |

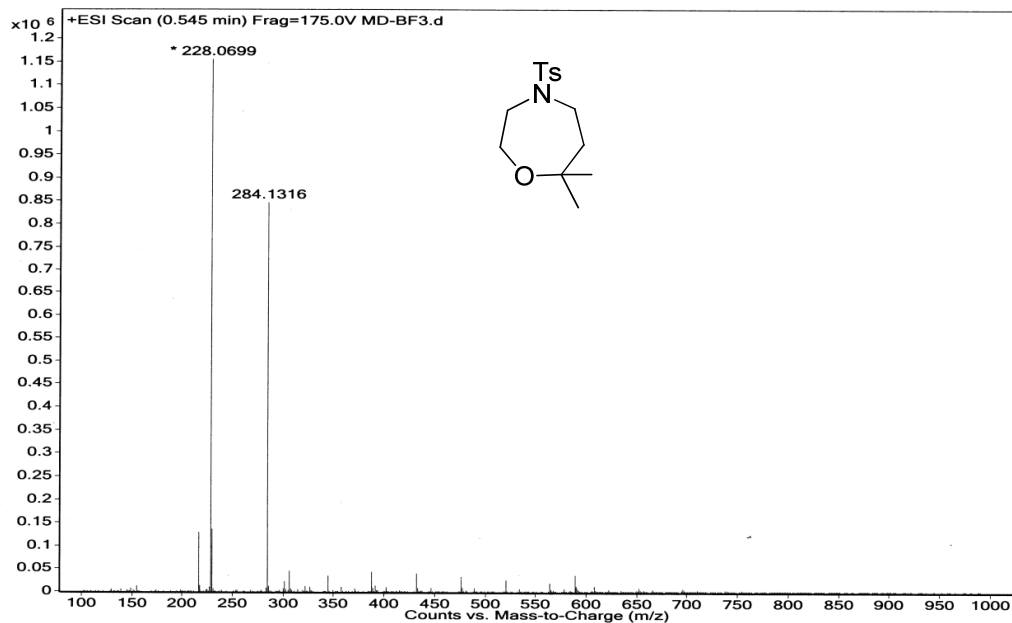

## HRMS Spectra of 6p

|               |  |             |  |                 |  |                        |  |
|---------------|--|-------------|--|-----------------|--|------------------------|--|
| Sample Name   |  | Position    |  | Instrument Name |  | User Name              |  |
| Inj Vol       |  | InjPosition |  | SampleType      |  | IRM Calibration Status |  |
| Data Filename |  | ACQ Method  |  | Comment         |  | Acquired Time          |  |

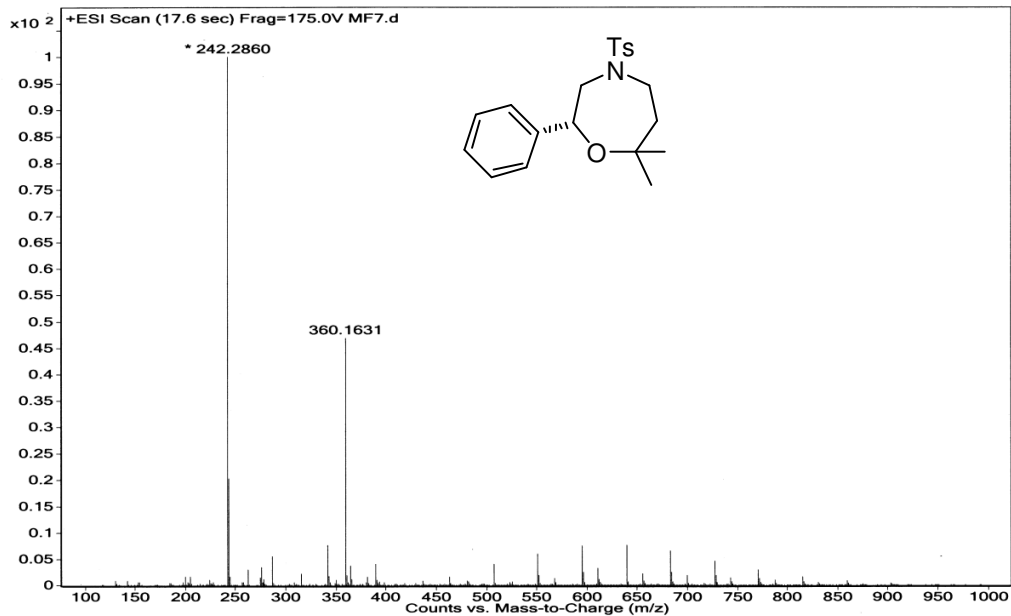

## HRMS Spectra of 6q

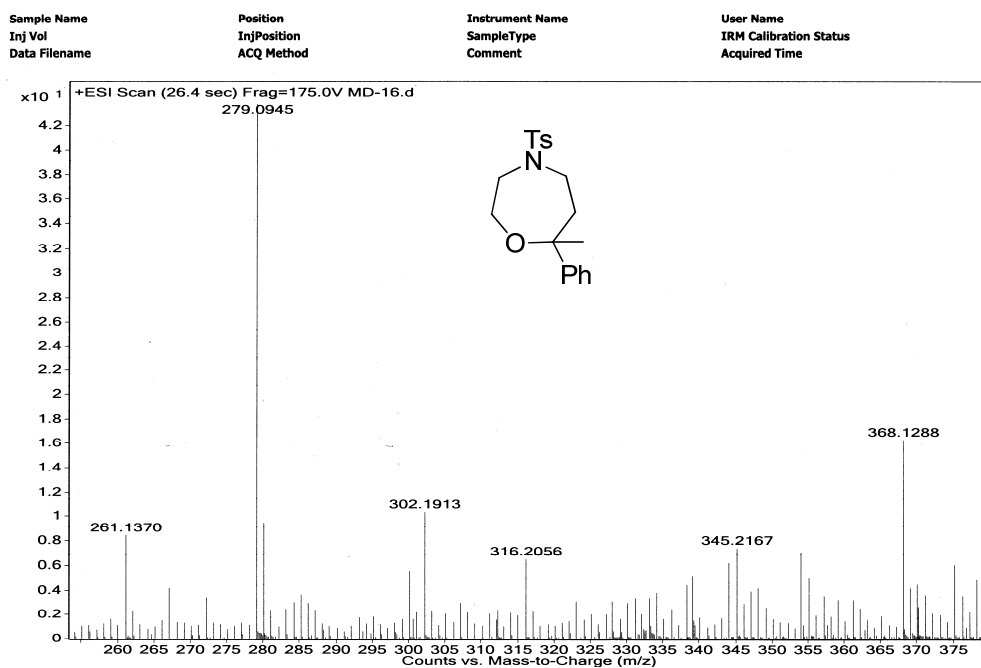

## HRMS Spectra of 6s

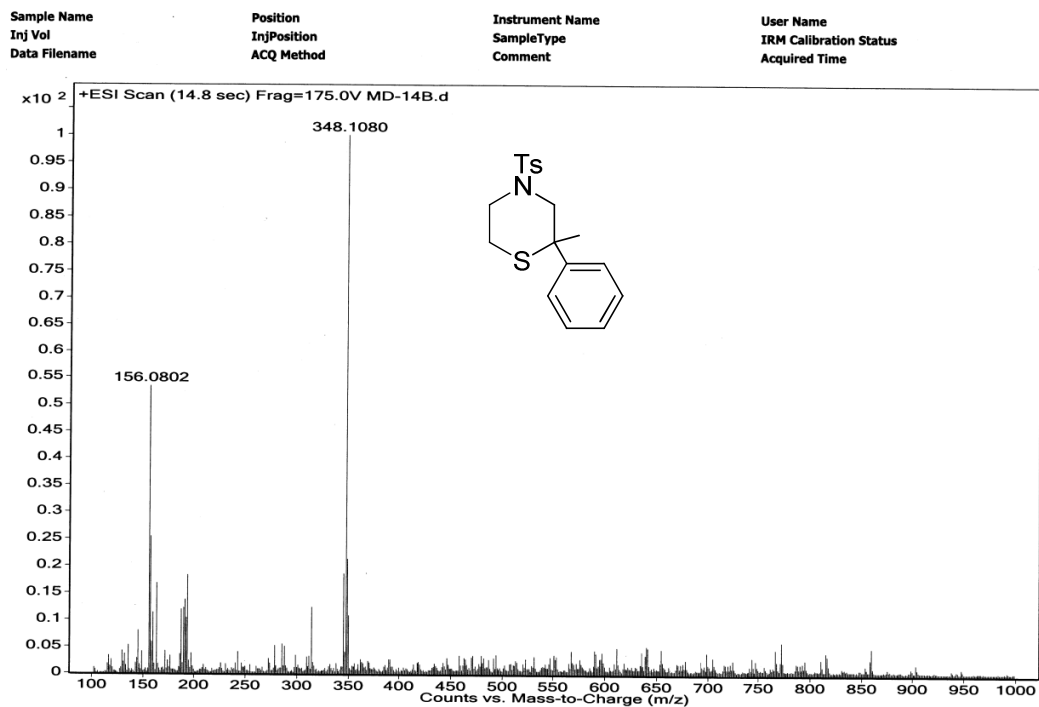

## HRMS Spectra of 6t

| Sample Name   | Position    | Instrument Name | User Name              |
|---------------|-------------|-----------------|------------------------|
| Inj Vol       | InjPosition | SampleType      | IRM Calibration Status |
| Data Filename | ACQ Method  | Comment         | Acquired Time          |

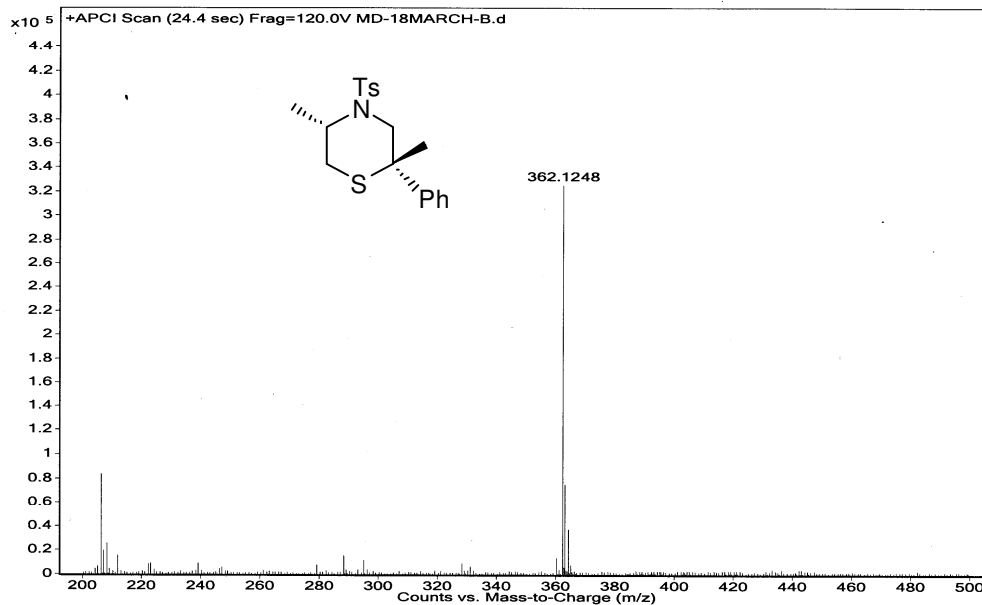

## HRMS Spectra of 7u

| Sample Name   | Position    | Instrument Name | User Name              |
|---------------|-------------|-----------------|------------------------|
| Inj Vol       | InjPosition | SampleType      | IRM Calibration Status |
| Data Filename | ACQ Method  | Comment         | Acquired Time          |

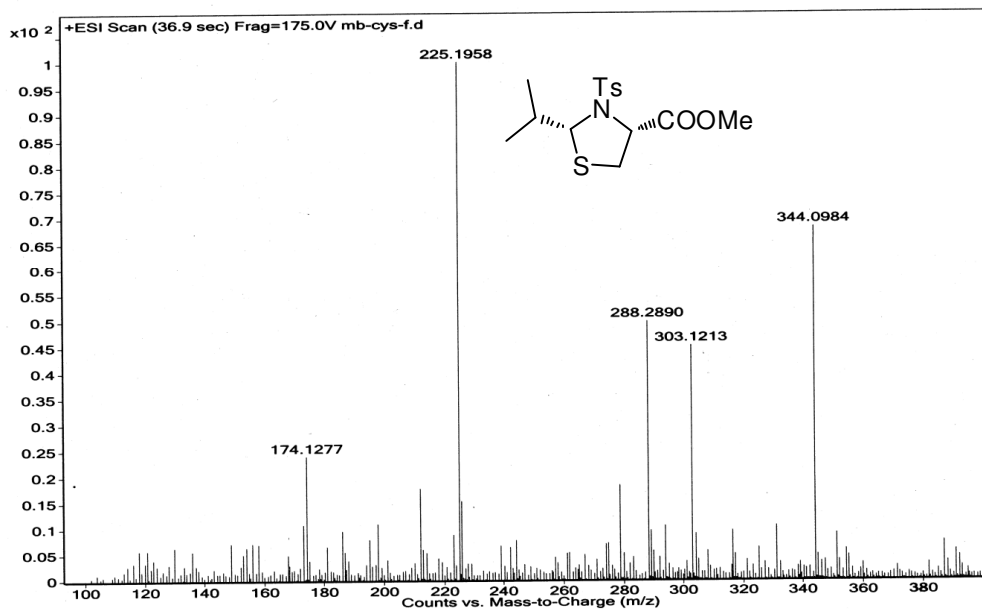

## HRMS Spectra of 7v

|               |             |                 |                        |
|---------------|-------------|-----------------|------------------------|
| Sample Name   | Position    | Instrument Name | User Name              |
| Inj Vol       | InjPosition | SampleType      | IRM Calibration Status |
| Data Filename | ACQ Method  | Comment         | Acquired Time          |

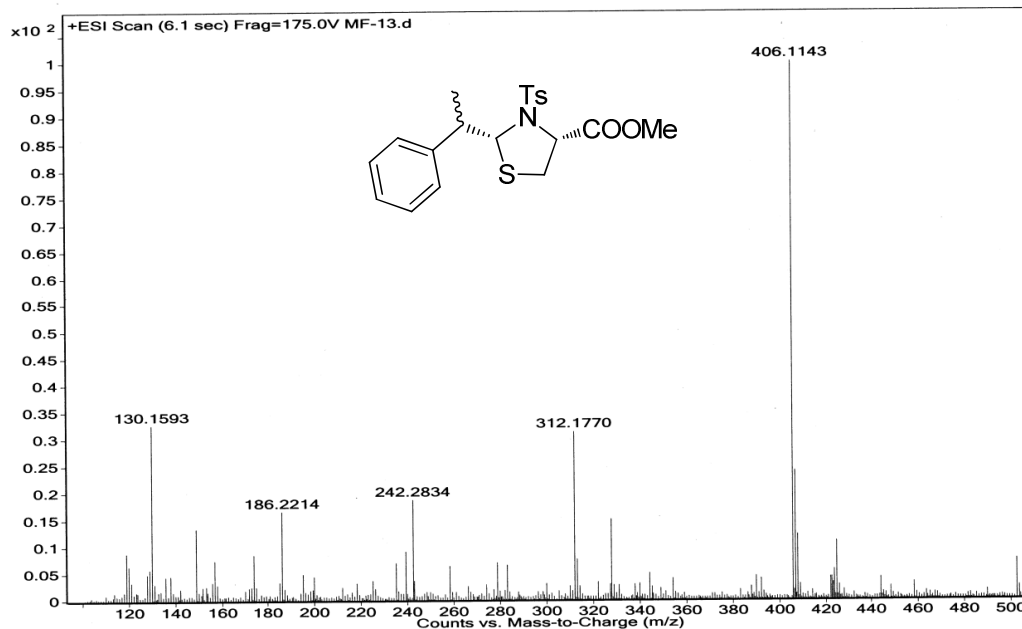

## HRMS Spectra of 7w

|               |           |             |        |                 |              |                        |                     |
|---------------|-----------|-------------|--------|-----------------|--------------|------------------------|---------------------|
| Sample Name   | MD-7U-A   | Position    | Vial 1 | Instrument Name | Instrument 1 | User Name              |                     |
| Inj Vol       | -10       | InjPosition |        | SampleType      | Sample       | IRM Calibration Status | Success             |
| Data Filename | MD-7U-A.d | ACQ Method  |        | Comment         |              | Acquired Time          | 1/7/2015 3:13:16 PM |

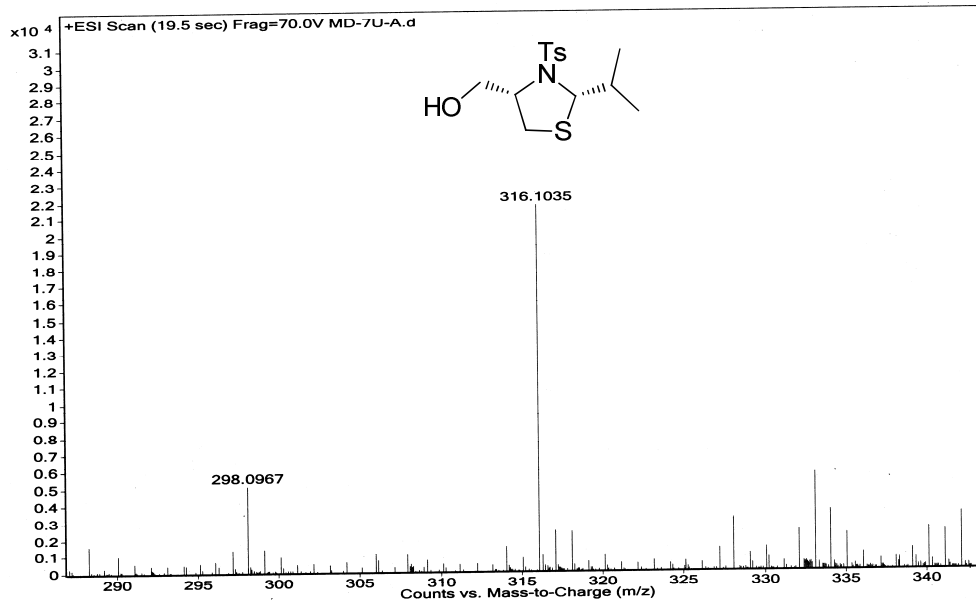

# HRMS Spectra of 7x

|                      |              |                    |             |                        |                                   |                               |             |
|----------------------|--------------|--------------------|-------------|------------------------|-----------------------------------|-------------------------------|-------------|
| <b>Sample Name</b>   | Unavailable  | <b>Position</b>    | Unavailable | <b>Instrument Name</b> | Unavailable                       | <b>User Name</b>              | Unavailable |
| <b>Inj Vol</b>       | Unavailable  | <b>InjPosition</b> | Unavailable | <b>SampleType</b>      | Unavailable                       | <b>IRM Calibration Status</b> | Success     |
| <b>Data Filename</b> | MD-SH-OH-6.d | <b>ACQ Method</b>  |             | <b>Comment</b>         | Sample information is unavailable | <b>Acquired Time</b>          | Unavailable |

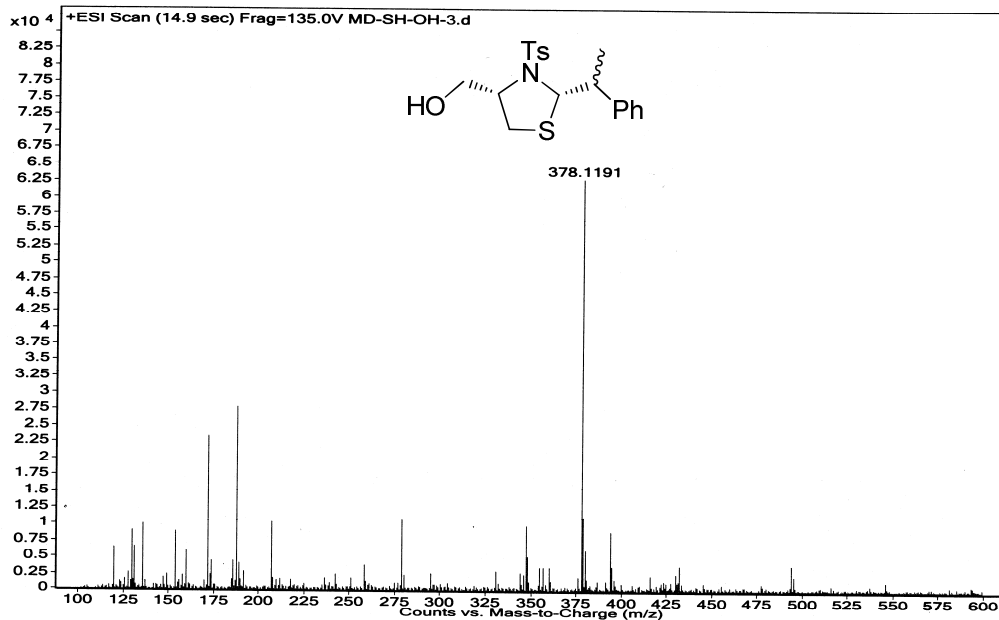

Supplement: Supplementary file 1 [file 3804448]
